# Supplementary material for: A meta-analysis of genome-wide association studies identifies multiple longevity genes
Source: PubMed Central journal article supplement (PMC6694136; doi:10.1038/s41467-019-11558-2), 2019-08-14
Supplement: 41467_2019_11558_MOESM9_ESM.pdf [file 41467_2019_11558_MOESM9_ESM.pdf]

## Reporting Summary

Nature Research wishes to improve the reproducibility of the work that we publish. This form provides structure for consistency and transparency in reporting. For further information on Nature Research policies, see [Authors & Referees](#) and the [Editorial Policy Checklist](#).

### Statistics

For all statistical analyses, confirm that the following items are present in the figure legend, table legend, main text, or Methods section.

n/a Confirmed

- The exact sample size ( $n$ ) for each experimental group/condition, given as a discrete number and unit of measurement
- A statement on whether measurements were taken from distinct samples or whether the same sample was measured repeatedly
- The statistical test(s) used AND whether they are one- or two-sided  
*Only common tests should be described solely by name; describe more complex techniques in the Methods section.*
- A description of all covariates tested
- A description of any assumptions or corrections, such as tests of normality and adjustment for multiple comparisons
- A full description of the statistical parameters including central tendency (e.g. means) or other basic estimates (e.g. regression coefficient) AND variation (e.g. standard deviation) or associated estimates of uncertainty (e.g. confidence intervals)
- For null hypothesis testing, the test statistic (e.g.  $F$ ,  $t$ ,  $r$ ) with confidence intervals, effect sizes, degrees of freedom and  $P$  value noted  
*Give  $P$  values as exact values whenever suitable.*
- For Bayesian analysis, information on the choice of priors and Markov chain Monte Carlo settings
- For hierarchical and complex designs, identification of the appropriate level for tests and full reporting of outcomes
- Estimates of effect sizes (e.g. Cohen's  $d$ , Pearson's  $r$ ), indicating how they were calculated

*Our web collection on [statistics for biologists](#) contains articles on many of the points above.*

### Software and code

Policy information about [availability of computer code](#)

Data collection

Not applicable

Data analysis

Data analyses were performed using publicly available software. The links and references are provided in the manuscript. In short, we used the following programs:

Imputation; SHAPEIT, IMPUTE, MaCH, minimac  
 Association analyses of individuals datasets; SNPTEST, PLINK, ProbABEL, R, SAS, CC-assoc  
 Quality control of individuals datasets; EasyQC  
 Meta-analyses; METAL and METASOFT  
 Conditional analyses; SNPTEST  
 Gene-level association analysis; MetaXcan  
 Genetic correlation analysis; LD score regression (including LDHub)  
 Power calculation; Genetic Association Study Power Calculator

For manuscripts utilizing custom algorithms or software that are central to the research but not yet described in published literature, software must be made available to editors/reviewers. We strongly encourage code deposition in a community repository (e.g. GitHub). See the Nature Research [guidelines for submitting code & software](#) for further information.

## Data

Policy information about [availability of data](#)

All manuscripts must include a [data availability statement](#). This statement should provide the following information, where applicable:

- Accession codes, unique identifiers, or web links for publicly available datasets
- A list of figures that have associated raw data
- A description of any restrictions on data availability

The full meta-analyses summary statistics are available for download at [www.longevitygenomics.org/downloads](http://www.longevitygenomics.org/downloads) and through GRASP (<https://grasp.nhlbi.nih.gov/FullResults.aspx>). All other data that supports the findings of this study are available from the corresponding authors upon request.

## Field-specific reporting

Please select the one below that is the best fit for your research. If you are not sure, read the appropriate sections before making your selection.

Life sciences       Behavioural & social sciences       Ecological, evolutionary & environmental sciences

For a reference copy of the document with all sections, see [nature.com/documents/nr-reporting-summary-flat.pdf](http://nature.com/documents/nr-reporting-summary-flat.pdf)

## Life sciences study design

All studies must disclose on these points even when the disclosure is negative.

|                 |                                                                                                                                                                                                                                                                                                                                                                                                                      |
|-----------------|----------------------------------------------------------------------------------------------------------------------------------------------------------------------------------------------------------------------------------------------------------------------------------------------------------------------------------------------------------------------------------------------------------------------|
| Sample size     | The sample size of the study was based on the number of samples that met our case/control-definition and had genome-wide genotyping data available that passed quality control.                                                                                                                                                                                                                                      |
| Data exclusions | Samples were excluded based on call rate. Moreover, we excluded ethnic outliers, duplicates, related individuals, gender mismatches, family mismatches, mismatches with previous genotyping, and samples with high levels of heterozygosity. Genetic variants were excluded based on the minor allele frequency, call rate, Hardy-Weinberg equilibrium P-value, imputation quality, and expected minor allele count. |
| Replication     | Replication was performed in the two cohorts in which de novo genotyping, using predesigned Taqman SNP Genotyping Assays, was applied. Moreover, we tried to validate our findings in two newly created UK Biobank parental longevity datasets and the parental lifespan dataset created by Timmers and colleagues.                                                                                                  |
| Randomization   | Not applicable                                                                                                                                                                                                                                                                                                                                                                                                       |
| Blinding        | Not applicable                                                                                                                                                                                                                                                                                                                                                                                                       |

## Reporting for specific materials, systems and methods

We require information from authors about some types of materials, experimental systems and methods used in many studies. Here, indicate whether each material, system or method listed is relevant to your study. If you are not sure if a list item applies to your research, read the appropriate section before selecting a response.

### Materials & experimental systems

| n/a                                 | Involved in the study                                           |
|-------------------------------------|-----------------------------------------------------------------|
| <input checked="" type="checkbox"/> | <input type="checkbox"/> Antibodies                             |
| <input checked="" type="checkbox"/> | <input type="checkbox"/> Eukaryotic cell lines                  |
| <input checked="" type="checkbox"/> | <input type="checkbox"/> Palaeontology                          |
| <input checked="" type="checkbox"/> | <input type="checkbox"/> Animals and other organisms            |
| <input type="checkbox"/>            | <input checked="" type="checkbox"/> Human research participants |
| <input checked="" type="checkbox"/> | <input type="checkbox"/> Clinical data                          |

### Methods

| n/a                                 | Involved in the study                           |
|-------------------------------------|-------------------------------------------------|
| <input checked="" type="checkbox"/> | <input type="checkbox"/> ChIP-seq               |
| <input checked="" type="checkbox"/> | <input type="checkbox"/> Flow cytometry         |
| <input checked="" type="checkbox"/> | <input type="checkbox"/> MRI-based neuroimaging |

## Human research participants

Policy information about [studies involving human research participants](#)

**Population characteristics** We used individuals from populations of European, Asian, or African-American descent. More details on the characteristics of the cohorts included in this manuscript are provided in the Supplementary information.

**Recruitment** Details on the recruitment procedures for the cohorts included in this manuscript are provided in the Supplementary information.

## Ethics oversight

We have complied with all relevant ethical regulations for work with human subjects. All participants provided written informed consent and the studies were approved by the relevant institutional review boards.

Note that full information on the approval of the study protocol must also be provided in the manuscript.
